# Supplementary material
Source: PubMed Central journal article supplement (PMC6388618)
Supplement: NIHMS999651-supplement-Appendix.pdf [file NIHMS999651-supplement-Appendix.pdf]

**Appendix**  
**Effectiveness of an App and Provider Counseling for Obesity Treatment in Primary Care**  
**Bennett et al.**

**Appendix Table 1.** 12-month Adjusted Mean Weight Change From Baseline by Intervention Engagement

| <b>Criterion</b>                                                                                      | <b>N</b> | <b>Met criteria<br/>Adjusted mean<br/>change<br/>(95% CI), kg</b> | <b>N</b> | <b>Did not meet<br/>criteria<br/>Adjusted mean<br/>change<br/>(95% CI), kg</b> | <b>Between group<br/>difference<br/>Adjusted mean<br/>difference<br/>(95% CI), kg</b> | <b><i>p</i>-<br/>value</b> |
|-------------------------------------------------------------------------------------------------------|----------|-------------------------------------------------------------------|----------|--------------------------------------------------------------------------------|---------------------------------------------------------------------------------------|----------------------------|
| ≥80% of self-monitoring                                                                               | 101      | -5.2 (-6.5, -4.0)                                                 | 41       | -1.7 (-3.6, 0.3)                                                               | -3.5 (-5.9, -1.2)                                                                     | 0.004                      |
| ≥80% receipt of counseling calls                                                                      | 96       | -5.2 (-6.4, -3.9)                                                 | 46       | -2.2 (-4.1, -0.3)                                                              | -3.0 (-5.3, -0.7)                                                                     | 0.01                       |
| ≥5 days per week self-weighing                                                                        | 36       | -7.5 (-9.6, -5.4)                                                 | 106      | -3.1 (-4.3, -1.9)                                                              | -4.4 (-6.8, -2.0)                                                                     | 0.0004                     |
| >80% of behavior tracking, >80%<br>receipt of counseling calls, and >5<br>days per week self-weighing | 34       | -7.6 (-9.8, -5.5)                                                 | 108      | -3.1 (-4.3, -1.9)                                                              | -4.5 (-7.0, -2.1)                                                                     | 0.0003                     |

**Appendix**  
**Effectiveness of an App and Provider Counseling for Obesity Treatment in Primary Care**  
**Bennett et al.**

**Appendix Table 2.** Comorbid Conditions Subgroup Analysis

| Variable              | N   | Intervention<br>Adjusted mean change<br>(95% CI) from baseline | N   | Usual Care<br>Adjusted mean change<br>(95% CI) from baseline | Between group<br>difference<br>Adjusted mean<br>(95% CI) | <i>p</i> -value |
|-----------------------|-----|----------------------------------------------------------------|-----|--------------------------------------------------------------|----------------------------------------------------------|-----------------|
| <b>Weight, kg</b>     |     |                                                                |     |                                                              |                                                          |                 |
| <b>Diabetes</b>       |     |                                                                |     |                                                              |                                                          |                 |
| 6 months              | 71  | -2.9 (-4.1, -1.8)                                              | 68  | 0.6 (-0.5, 1.7)                                              | -3.5 (-5.1, -1.9)                                        | <0.0001         |
| 12 months             | 71  | -2.2 (-3.7, -0.8)                                              | 68  | -0.4 (-1.8, 1.1)                                             | -1.8 (-3.9, 0.2)                                         | 0.08            |
| <b>Hypertension</b>   |     |                                                                |     |                                                              |                                                          |                 |
| 6 months              | 137 | -4.4 (-5.2, -3.5)                                              | 138 | 0.4 (-0.4, 1.1)                                              | -4.7 (-5.8, -3.6)                                        | <0.0001         |
| 12 months             | 137 | -4.3 (-5.3, -3.3)                                              | 138 | 0.1 (-0.8, 1.1)                                              | -4.4 (-5.9, -3.0)                                        | <0.0001         |
| <b>Hyperlipidemia</b> |     |                                                                |     |                                                              |                                                          |                 |
| 6 months              | 96  | -4.0 (-5.0, -3.0)                                              | 89  | 0.03 (-1.0, 1.0)                                             | -4.1 (-5.5, -2.6)                                        | <0.0001         |
| 12 months             | 96  | -4.0 (-5.2, -2.7)                                              | 89  | -0.7 (-2.0, 0.6)                                             | -3.3 (-5.1, -1.5)                                        | 0.0003          |
| <b>SBP, mm Hg</b>     |     |                                                                |     |                                                              |                                                          |                 |
| <b>Diabetes</b>       |     |                                                                |     |                                                              |                                                          |                 |
| 6 months              | 71  | -3.7 (-8.8, 1.4)                                               | 68  | -0.8 (-5.8, 4.2)                                             | -2.9 (-9.8, 3.9)                                         | 0.39            |
| 12 months             | 71  | -11.4 (-16.2, -6.5)                                            | 68  | -7.1 (-11.7, -2.4)                                           | -4.3 (-10.7, 2.1)                                        | 0.19            |
| <b>Hypertension</b>   |     |                                                                |     |                                                              |                                                          |                 |
| 6 months              | 137 | -3.6 (-7.0, -0.2)                                              | 138 | -4.4 (-7.6, -1.1)                                            | 0.8 (-3.7, 5.2)                                          | 0.74            |
| 12 months             | 137 | -7.4 (-10.9, -3.9)                                             | 138 | -7.8 (-11.2, -4.4)                                           | 0.4 (-4.2, 5.0)                                          | 0.87            |
| <b>Hyperlipidemia</b> |     |                                                                |     |                                                              |                                                          |                 |
| 6 months              | 96  | -4.1 (-8.1, -0.1)                                              | 89  | -4.2 (-8.3, -0.2)                                            | 0.1 (-5.2, 5.4)                                          | 0.97            |
| 12 months             | 96  | -12.3 (-16.3, -8.3)                                            | 89  | -6.2 (-10.3, -2.2)                                           | -6.1 (-11.5, -0.7)                                       | 0.03            |
| <b>DBP, mm Hg</b>     |     |                                                                |     |                                                              |                                                          |                 |
| <b>Diabetes</b>       |     |                                                                |     |                                                              |                                                          |                 |
| 6 months              | 71  | -2.9 (-5.9, 0.0)                                               | 68  | -0.4 (-3.3, 2.5)                                             | -2.5 (-6.5, 1.4)                                         | 0.20            |
| 12 months             | 71  | -6.0 (-9.0, -3.1)                                              | 68  | -4.1 (-7.0, -1.3)                                            | -1.9 (-5.7, 1.9)                                         | 0.32            |
| <b>Hypertension</b>   |     |                                                                |     |                                                              |                                                          |                 |
| 6 months              | 137 | -3.7 (-5.7, -1.7)                                              | 138 | -3.1 (-5.0, -1.2)                                            | -0.6 (-3.2, 2.0)                                         | 0.63            |
| 12 months             | 137 | -4.5 (-6.7, -2.3)                                              | 138 | -4.4 (-6.5, -2.2)                                            | -0.1 (-3.0, 2.8)                                         | 0.94            |
| <b>Hyperlipidemia</b> |     |                                                                |     |                                                              |                                                          |                 |

**Appendix**  
**Effectiveness of an App and Provider Counseling for Obesity Treatment in Primary Care**  
**Bennett et al.**

|                                 |     |                     |     |                     |                     |       |
|---------------------------------|-----|---------------------|-----|---------------------|---------------------|-------|
| 6 months                        | 96  | -3.4 (-5.7, -1.1)   | 89  | -2.5 (-4.8, -0.2)   | -0.9 (-4.0, 2.2)    | 0.58  |
| 12 months                       | 96  | -7.4 (-9.9, -5.0)   | 89  | -3.2 (-5.6, -0.7)   | -4.3 (-7.5, -1.1)   | 0.009 |
| <b>Total cholesterol, mg/dL</b> |     |                     |     |                     |                     |       |
| <b>Diabetes</b>                 |     |                     |     |                     |                     |       |
| 12 months                       | 57  | -6.1 (-21.6, 9.4)   | 60  | -13.5 (-27.7, 0.7)  | 7.4 (-5.2, 19.9)    | 0.25  |
| <b>Hypertension</b>             |     |                     |     |                     |                     |       |
| 12 months                       | 111 | -3.9 (-12.3, 4.6)   | 123 | -5.5 (-13.7, 2.6)   | 1.7 (-7.2, 10.5)    | 0.71  |
| <b>Hyperlipidemia</b>           |     |                     |     |                     |                     |       |
| 12 months                       | 84  | -3.0 (-14.4, 8.5)   | 82  | -4.8 (-15.5, 5.8)   | 1.9 (-9.3, 13)      | 0.74  |
| <b>LDL, mg/dL</b>               |     |                     |     |                     |                     |       |
| <b>Diabetes</b>                 |     |                     |     |                     |                     |       |
| 12 months                       | 47  | -4.8 (-18.2, 8.7)   | 55  | -6.2 (-18.3, 5.9)   | 1.5 (-9.8, 12.7)    | 0.80  |
| <b>Hypertension</b>             |     |                     |     |                     |                     |       |
| 12 months                       | 97  | -2.6 (-10.7, 5.4)   | 109 | 1.1 (-6.5, 8.8)     | -3.8 (-1.2 to 4.5)  | 0.37  |
| <b>Hyperlipidemia</b>           |     |                     |     |                     |                     |       |
| 12 months                       | 75  | -6.0 (-16.0, 4.0)   | 72  | -2.0 (-11.5, 7.5)   | -4 (-13.7, 5.6)     | 0.41  |
| <b>HDL, mg/dL</b>               |     |                     |     |                     |                     |       |
| <b>Diabetes</b>                 |     |                     |     |                     |                     |       |
| 12 months                       | 56  | 1.5 (-2.8, 5.8)     | 60  | -2.4 (-6.1, 1.4)    | 3.9 (-0.02, 7.8)    | 0.051 |
| <b>Hypertension</b>             |     |                     |     |                     |                     |       |
| 12 months                       | 108 | 3.7 (1.1, 6.2)      | 122 | -0.02 (-2.4, 2.4)   | 3.7 (1.0, 6.4)      | 0.007 |
| <b>Hyperlipidemia</b>           |     |                     |     |                     |                     |       |
| 12 months                       | 83  | 4.2 (0.9, 7.5)      | 81  | 0.6 (-2.4, 3.6)     | 3.6 (0.3, 6.9)      | 0.03  |
| <b>Triglycerides, mg/dL</b>     |     |                     |     |                     |                     |       |
| <b>Diabetes</b>                 |     |                     |     |                     |                     |       |
| 12 months                       | 55  | -6.9 (-42.8, 29.0)  | 58  | -20.9 (-52.8, 10.9) | 14 (-19.0, 47.0)    | 0.40  |
| <b>Hypertension</b>             |     |                     |     |                     |                     |       |
| 12 months                       | 104 | -12.6 (-34.4, 9.2)  | 118 | -15.4 (-35.9, 5.0)  | 2.8 (-20.0, 25.7)   | 0.81  |
| <b>Hyperlipidemia</b>           |     |                     |     |                     |                     |       |
| 12 months                       | 83  | -15.2 (-45.3, 14.9) | 78  | -10.8 (-38.7, 17.2) | -4.5 (-35.3, 26.3)  | 0.77  |
| <b>Glucose, mg/dL</b>           |     |                     |     |                     |                     |       |
| <b>Diabetes</b>                 |     |                     |     |                     |                     |       |
| 12 months                       | 57  | -25.6 (-48.4, -2.8) | 62  | -3.9 (-24, 16.2)    | -21.7 (-42.2, -1.2) | 0.04  |

**Appendix**  
**Effectiveness of an App and Provider Counseling for Obesity Treatment in Primary Care**  
**Bennett et al.**

|                       |     |                   |     |                    |                    |      |
|-----------------------|-----|-------------------|-----|--------------------|--------------------|------|
| <b>Hypertension</b>   |     |                   |     |                    |                    |      |
| 12 months             | 111 | -3.6 (-13, 5.7)   | 125 | 2 (-7.0, 10.9)     | -5.6 (-15.4, 4.2)  | 0.26 |
| <b>Hyperlipidemia</b> |     |                   |     |                    |                    |      |
| 12 months             | 84  | -9.2 (-23, 4.6)   | 83  | 4.2 (-8.5, 16.9)   | -13.4 (-27.3, 0.5) | 0.06 |
| <b>HbA1c, %</b>       |     |                   |     |                    |                    |      |
| <b>Diabetes</b>       |     |                   |     |                    |                    |      |
| 12 months             | 49  | -1.0 (-1.6, -0.5) | 58  | -0.5 (-1.0, -0.05) | -0.5 (-1.0, -0.04) | 0.04 |
| <b>Hypertension</b>   |     |                   |     |                    |                    |      |
| 12 months             | 104 | -0.3 (-0.5, -0.1) | 119 | -0.2 (-0.4, 0.02)  | -0.2 (-0.4, 0.1)   | 0.14 |
| <b>Hyperlipidemia</b> |     |                   |     |                    |                    |      |
| 12 months             | 77  | -0.4 (-0.7, -0.2) | 79  | -0.3 (-0.5, -0.01) | -0.2 (-0.5, 0.1)   | 0.26 |

*Notes:* SI conversion factors: To convert cholesterol to mmol/L, multiply values by 0.0259; triglycerides to mmol/L, multiply values by 0.0113; Fasting glucose to mmol/L, multiply values by 0.0555.

SBP, systolic blood pressure; DBP, diastolic blood pressure; LDL, low density lipoprotein; HDL, high density lipoprotein; SI, International System of Units.
